# Supplementary material
Source: publisher site journal article supplement (https://www.dovepress.com/article/316935)
Supplement: Supplementary file 1 [file get_supplementary_file.php]

**Supplementary Table 1.** The information of expression profiles

| Reference | Series | Platforms | Number of samples (Tumor/Control) |
| --- | --- | --- | --- |
| AE, F., et al.[1], 2014 | GSE41372 | GPL16142 | (15/15) |
| M, P., et al.[2] 2014 | GSE43795 | GPL10558 | (26/5) |

**References:**

[1]. AE, F., et al., MicroRNAs cooperatively inhibit a network of tumor suppressor genes to promote pancreatic tumor growth and progression. Gastroenterology, 2014. 146(1): p. 268-77.e18.

[2]. M, P., et al., Characterization of gene expression and activated signaling pathways in solid-pseudopapillary neoplasm of pancreas. Modern pathology : an official journal of the United States and Canadian Academy of Pathology, Inc, 2014. 27(4): p. 580-93.

**Supplementary Table 2.** The specific sequences of different primers in this study

| Genes |  | Sequences of primers | prodSize |
| --- | --- | --- | --- |
| U6  U6 | forward | TCG CTT CGG CAG CAC ATA | 130  130 |
| reverse | TTT GCG TGT CAT CCT TGC |
| miR-455 | forward | CCGCAGTCCATGGGCATATACAC | 0 |
| GAPDH | forward | ACA ACT TTG GTA TCG TGG AAG G | 133 |
| GAPDH  HOXC4 | reverse | GCC ATC ACG CCA CAG TTT C | 133  107 |
| forward | CACGGTGAACCCCAATTATAAC |
| HOXC4  DYNLL1 | reverse | GGTAGCGGTTGTAATGAAACTC | 107  167 |
| forward | CAACATAGAGAAGGACATTGCG |
| DYNLL1  MGLL | reverse | ATTTGAACAGAAGAATGGCCAC | 167  183 |
| forward | TAGTGTCTGACTTCCACGTTTT |
| MGLL  DLG4  DLG4 | reverse  forward  reverse | GAACCAGAGGCGAAATGAGTA  GGGAGATGGAATACGAGGAAAT  CTTGGTGATGAAAATGGATGGG | 183  119  119 |

**Supplementary Table 3.** List of differential expression miRNAs with the criteria of |log FC| >1, *P*‑value <0.05 and adjusted *P*‑value <0.05 in GSE41372

| Up-regulated miRNAs | P.Value | logFC | Down-regulated miRNAs | P.Value | logFC |
| --- | --- | --- | --- | --- | --- |
| hsa-miR-27b | 0.0015497 | 5.973202 | hsa-miR-1206 | 0.0038086 | -1.00703 |
| hsa-miR-27a | 0.0000816 | 3.578771 | kshv-miR-K12-11 | 0.0031045 | -1.02411 |
| hsa-miR-150 | 0.0010911 | 3.254483 | hsa-miR-711 | 0.0016451 | -1.02969 |
| hsa-miR-145 | 0.0000106 | 3.220673 | hsa-miR-656 | 0.0005493 | -1.03884 |
| hsa-miR-199a-5p | 0.0002349 | 3.21853 | hsa-miR-603 | 0.0015575 | -1.1328 |
| hsa-miR-21 | 0.0000222 | 2.993246 | hsa-miR-302c | 0.0000354 | -1.29509 |
| hsa-miR-223 | 0.0000359 | 2.906234 | hsa-miR-383 | 0.0007012 | -1.33999 |
| hsa-miR-142-3p | 0.0007023 | 2.870873 | hsa-miR-635 | 0.0024544 | -1.61336 |
| hsa-miR-125b | 0.0020099 | 2.845016 | hsa-miR-770-5p | 0.0027849 | -1.73136 |
| hsa-miR-10a | 0.0000058 | 2.811337 | hsa-miR-455-3p | 0.0031505 | -2.0421 |
| hsa-miR-135b | 0.0000001 | 2.759445 | hsa-miR-655 | 0.0024724 | -2.19495 |
| hsa-miR-143 | 0.0011227 | 2.684267 | hsa-miR-130b | 0.0010001 | -2.60682 |
| hsa-miR-142-5p | 0.0001260 | 2.584129 | hsa-miR-216a | 0.0007830 | -2.64854 |
| hsa-miR-199b-5p | 0.0009368 | 2.571761 | hsa-miR-217 | 0.0015637 | -3.56155 |
| hsa-miR-100 | 0.0012232 | 2.510437 | hsa-miR-630 | 0.0000321 | -4.20851 |
| hsa-miR-125a-5p | 0.0000504 | 2.439744 |  |  |  |
| hsa-miR-199a-3p +hsa-miR-199b-3p | 0.0012878 | 2.43143 |  |  |  |
| hsa-miR-23a | 0.0017790 | 2.259116 |  |  |  |
| hsa-miR-1975 | 0.0000799 | 2.219379 |  |  |  |
| hsa-miR-221 | 0.0000024 | 2.148788 |  |  |  |
| hsa-miR-342-3p | 0.0000477 | 2.110853 |  |  |  |
| hsa-miR-197 | 0.0000084 | 2.081883 |  |  |  |
| hsa-let-7i | 0.0008973 | 2.063793 |  |  |  |
| hsa-miR-99a | 0.0015824 | 1.977899 |  |  |  |
| hsa-miR-129-3p | 0.0007618 | 1.975779 |  |  |  |
| hsa-miR-361-5p | 0.0004198 | 1.80619 |  |  |  |
| hsa-miR-490-3p | 0.0000135 | 1.804387 |  |  |  |
| hsa-miR-331-3p | 0.0000769 | 1.793161 |  |  |  |
| hsa-miR-484 | 0.0000241 | 1.792737 |  |  |  |
| hsa-miR-574-3p | 0.0033715 | 1.657487 |  |  |  |
| hsa-miR-218 | 0.0024299 | 1.647002 |  |  |  |
| hsa-miR-374b | 0.0027250 | 1.633734 |  |  |  |
| hsa-miR-31 | 0.0016987 | 1.568806 |  |  |  |
| hsa-miR-222 | 0.0011617 | 1.541778 |  |  |  |
| hsa-miR-450a | 0.0006239 | 1.467257 |  |  |  |
| hsa-miR-140-3p | 0.0000907 | 1.426102 |  |  |  |
| hsa-miR-1178 | 0.0025664 | 1.363857 |  |  |  |
| hsa-miR-190b | 0.0001771 | 1.300676 |  |  |  |
| hsa-miR-155 | 0.0019674 | 1.286472 |  |  |  |
| hsa-miR-107 | 0.0004352 | 1.26465 |  |  |  |
| hsa-miR-337-3p | 0.0000997 | 1.264437 |  |  |  |
| hsa-miR-324-5p | 0.0006994 | 1.260087 |  |  |  |
| hsa-miR-509-3p | 0.0037158 | 1.140741 |  |  |  |
| hsa-miR-1537 | 0.0006276 | 1.135183 |  |  |  |
| hsa-miR-1236 | 0.0003883 | 1.121483 |  |  |  |
| hsa-miR-193a-5p | 0.0006792 | 1.065578 |  |  |  |
| hsa-miR-10b | 0.0004941 | 1.03881 |  |  |  |

**Supplementary Table 4**. List of differential expression genes with the criteria of |log FC| >1, *P*‑value<0.05 and adjusted *P*‑value<0.05 times in GSE43795

| **DEGs** | **Genes Name** |
| --- | --- |
| Up-regulated | PCDH15;SERPINE3;AURKB;PI15;VCX3A;BUB1;PBK;KIF20A;TUBB3;SPOCD1;HMMR;SEC14L2;TOP2A;GINS2;CENPM;ESPL1;CDC20;MELK;CDKN3;ENTPD7;SPP1;TMEM158;FAM83H;CDCA5;MCM10;CENPF;GNG13;CDCP1;PTTG3P;EZH2;CHEK1;NID2;TRIP13;PARPBP;MTFP1;CDK1;SNORD96A;PTTG1;PHLDA1;UHRF1;TYMS;MT2A;UBASH3B;MCM2;SLC22A4;UBE2T;CCNF;CCDC34;HMGA1;NT5DC2;FEN1;CKS2;STEAP1;MCM4;BEND6;ITGA2;ECT2;PLEK2;OIP5;POC1A;CLCF1;C17orf53;KIF14;COL6A3;SLC38A10;SERPINH1;CENPI;ANGPT2;CDCA7;TIMELESS;NOCT;CHST1;CDC7;GK;IKBIP;CARD9;RACGAP1;CD82;SNAI2;CKAP2;SMOX;MT1E;SLC20A1 |
| Down-regulated | CTRB1;TRY6;SERPINI2;PNLIPRP2;CTRL;PNLIPRP1;CELA2B;PDIA2;AQP8;CPA1;CPA2;CTRB2;CUZD1;KLK1;LOC730924;SYCN;CELP;REG1B;CLPS;ELA2A;ERP27;ALB;GP2;AQP12A;ELA3A;LOC100133432;LOC100134294;GSTA2;RBPJL;LOC648749;LOC652641;PRSS1;CELA3B;GSTA5;GSTA1;CPB1;REG1A;PLA2G1B;PRSS2;LOC340204;ANPEP;LOC653437;CTRC;GNMT;REG3G;CBS;PM20D1;SLC3A1;SLC4A4;LOC390760;CEL;PTF1A;OR51E2;LGALS2;DEFB1;MT1G;MIR328;DMRTA2;REG4;LOC642003;TMED6;EGF;LOC100129129;TNFAIP2;GUCA1C;SST;GATM;IAPP;SLC16A10;GCG;AMY2A;LOC441655;PNLIP;SCTR;KISS1R;IMPA2;RARRES2;C2CD4B;SERPINA3;NRG4;PRSS3;CFTR;DNASE1;SERPINA5;KIAA1324;TMEM52;SFRP5;ANKRD38;IL22RA1;KANK4;SPACA3;BCAT1;TDH;SPINK1;MUC1;AZGP1;CCKBR;TNS4;ATP4A;FAM129A;INS;HS.223856;C1ORF24;DKFZP779B1634;SLC39A5;CAMTA2;MT1H;SEL1L;CD24;ZNF57;MYC;CA12;BTG2;C6;LOC553137;RP13360B22.2;LINCR;FAM3B;TEX11;SNORD104;GPT2;EFCAB4A;NLF2;P2RX1;LEFTY1;PGC;HS.572444;LOC728185;INSM1;ACADL;MTE;CLDN10;MMP7;TPST2;MT1M;LOC285016;SIGLEC11;FLRT2;CITED4;C20ORF127;RNF186;FGL1;TACSTD2;CAMK1G;BACE1;GDF10;LOC643719;FAM150B;FXYD2;NKX25;C12ORF39;VTCN1;SLC30A2;RAP1GAP;NR5A2;GDF15;FOSB;DLK1;AMY1B;LOC653436;FLJ32569;ENPP1;PTGER4;GJB1;PPY;GGT6;HS.155736;KIAA1881;LMO3;CXCL17;PTGDS;LOC652769;LOC652684;AMY2B;SLC43A1;PELI2;MCOLN3;OR5L1;AOX1;GOLSYN;TMEM30B;C6ORF126;KIF1A;LOC732428;TOP3B;DPT;F11;SCNN1A;CGNL1;TCEA3;LOC643747;QPCTL;CFD;LOC645648;CXCL12;TMPRSS2;C10ORF10;MT1E;TMEM186;IGFBP2;PROM1;GMNN;SGK1;AKR7A3;FKBP11;CHRM3;SIK1;LOC644468;DLL1;ALDH1L1;ZNF807;PDX1;MAP7D2HS.279842;NPHS1;HSPC157;REG3A;LOC648392;KIRREL2;NRCAM;ERRFI1;GCAT;LOC285095;PRSS8;LOC647169;P8;SERPINF1;LOC730413;IQGAP2;CABC1;SGK;UCA1;LOC400455;TTYH1;LOC652721;C5;MT2A;SOD3;HHEX;C20ORF56;LOC647197;CSDC2;STC2;COCH;CCDC110;EPHX1;SLC8A2;ERO1LB;RNF144;FLJ37644;LOC653817;MT1X;FABP4;LOC400304;RAMP1;AQP12B;FBP1;KCNJ8;HS.487766;CHAC1;CLDN1;LOC441019;IER3;TOB1;LMF2;IL32;C10ORF81;TF;PLIN;C7;CYB5A;LOC647537;LRMP;GAS1;PHYHD1;HS.426929;LOC646437;BRSK2;SMPDL3B;SRPX;HEYL;HS.467627;PDK4;ACY3;APOBEC2;CAMK2N2;RRBP1;SLC39A14;SLC30A8;PROM2;HPN;MT1F;LOC644953;MEIS1;NUPR1;MT1A;PABPC4;LOC388564;SSFA2;ACSS1;IFNA16;TC2N;ONECUT1;KIAA0922;CEBPA;RNF144A;KIF12;BCL2L12;NR4A2;SPAG4;EVI1;FAM171A1;CA2;CRYAB;ZNF70;COMTD1;PRPS2;LGR4;GDPD5;LOC646576;LOC388900;RNASE1;SIDT2;LOC643272;KLK11;PLA2G10;HS.34447;ADH1A;STX19;DPEP1;SOX9;RAB26;CXCR7;MGAT4A;C9ORF75;LOC644838;COBLL1;C8ORF4;PLCE1;CEND1;MFAP4;UGT2A3;APOD;TMEM97;CXCL2;GRPR;MYOM1;FLJ10986;LOC644830;RAPGEF5;SNORA12;MGC61598;PIWIL2;C16ORF48;PIK3AP1;JUN;SLC25A22;XBP1;SDC4;TRIM50;MNX1;FAM149A;EFNB3;GPHA2;FAM87A;CHAD;SLC25A15;ALDH1L2;HS.453381;COBL;MUM1L1;CCL2;ARID3B;NTN4;NUCB2;LOC642106;SLC1A2;DES;LOC649025;KRTCAP3;FOXC1;ILDR1;HSD17B8;ANXA9;ADH1C;HM13;INSIG1;FLJ23152;FOXA3;CCDC64B;KCNJ16;ADM2;LOC401676;HBBP1;C4ORF19;PNPLA7;MEG3;CPA3;PRSS16;SLC38A5;AQP1;EDN1;MOSC2;ECHDC3;PON3;LOC647074;SVEP1;PKNOX2;FBLN5;SH3BP4;LOC146439;EPHB3;SIX5;DMKN;LOC643870;GFI1;LOC391019;ACSM3;GATA4;GOLGA8A;KCNK16;FLJ22662;CYP2E1;HABP2;CHST4;MAT1A;NIT1;FLJ40712;LOC644937;HS.576106;TCF23;CASR;PGA5;CDO1;LOC389286;ID4;PLTP;SLC27A2;LOC441550;C10ORF116;FLJ12529;KLB;HS.127009;RPL14;IFT20;HS.559604;TNFRSF12A;CYR61;SEPX1;LOC400652;MARVELD3;ARHGDIG;SLC38A3;ANXA4;LOC392522;PLD1;C14ORF105;PLEKHH3;ALMS1;CLIC6;C8ORF47;PTPRK;TFPI2;ENTPD3;JCLN;SV2B;HS.135131;LOC652565;GPC4;HTR3A;CTNND2;LOC729264;RPL12P6;HS.549989;LOC729768;WDR5;LOC255620;HS.105791;GOLGA8B;MAP3K5;RGN;SERPINB1;LOC645391;MAPK9;LOC729385;LOC126235;LOC441642;F3;RNY4;LOC651149;CCNO;JPH1;MACROD1;LOC390183;PHYHIPL;LOC653778;LOC642299;PHLDB1;CENTA1;PRKCDBP;LOC100130562;LOC730083;PRPH2;LOC648984;PLEKHG3;CIDEC;HEXDC;PBX3;LOC648852;GLS2;AMAC1L3;HSPB6;HEBP1;LOC653158;C4ORF23;SRPR;FBP2;LOC100129905;LOC442270;ARHGEF10L;CLDN2;LOC401640;TIFA;G6PC2;AFAR3;TKT;LOC647436;SMOC2;MGC13057;ADRA2A;SERP1;GIPC2;SYTL4;SRM;FIT1;GRHL2;PCDP1;LOC654103;GOLGA6B;VSTM2A;PSORS1C3;PAPSS2;ANKDD1A;GADD45B;KIAA1804;PPAPDC1B;PDZK1P1;SND1;HS.100261;CTGF;C10ORF65;ZFP36L2;LOC285804;LOC646909;MGST1;LOC441461;TMEM20;PNPLA2;PRDX4;NOSTRIN;LOC392301;TMEM166;GAMT;ACOX2;C1ORF92;STARD10;STOX2;LOC652734;C3ORF52;PEX7;MSTP9;LOC100129982;RHOD;SLC1A4;HIST1H1C;SMTNL2;REEP6;HS.334093;FAM46C;LOC652388;SSR3;PDGFRL;PLEKHH1;MAST3;LOC643779;SLC7A1;RBP4;REG1P;SLC6A16;LOC401074;MKNK2;C2ORF34;SPATA13;SLC17A4;SRPRB;CTH;HS.445414;TRPV6;LOC730176;CPA4;DUSP1;ANGEL1;OR8D4;KCTD14;EPHX2;CEP164;EML4;ADAMTS1;CAV2;ST6GALNAC4;ASAP3;LOC441154;LOC643007;TPM1;PBX1;NUDT11;DGCR5;NGB;PLXNA2;THRSP;HS.545976;LOC647389;LOC642738;NEDD4L;LOC402677;UGT2B15;LRRC26;HS.542428;DDIT4;NOTCH1;LOC100132395;FGD3;LOC136143;NOMO1;HNF1B;MAPKAPK3;RPL3L;NSUN7;LRG1;FURIN;MYO5C;ARSE;WNK2;MST1;SERPING1;DAB2;LOC649209;MTMR12;RIPK4;HS.99253;TBC1D4;P4HB;EPN3;AGPAT2;SLC39A8;MIR216A;HS.334493;PAH;LOC388344;SYTL1;LOC642031;FMO2;LOC390735;SH3RF2;MGC72080;C15ORF38;PHF2;BSPRY;PTCHD3;EIF2AK3;CD302;PRDM7;HS.568928;LOC730288;HS.147562;LOC641727;LOC100133329;DUSP8;RCAN1;GALM;ABAT;ASB9;FAM59A;CXCL11;GPRC5C;C17ORF28;COL15A1;GRB14;LOC387753;LOC648659;LOC100129243;ASH1L;TM7SF2;LOC653702;PACSIN3;AVPI1;TMEM8;TCIRG1;MID1IP1;HS.291319;MCCC1;HES1;IFFO2;AADAC;ZBTB42;C22ORF30;PACSIN2;TRIM74;CXCL1;LOC100131672;GRAMD1C;LPAR2;FAM162A;SLC2A10;PLLP;MPP6;LOC100133008;IMPDH2;LOC643431;LOC645630;FAM124A;RYR2;ACTRT1;KLK3;SNORD89;TMEM214;GFRA3;GATS;DKFZP564J102;LOC100130000;PDCD4;PPAP2B;BIN1;LOC92497;LOC440993;TMEM56;LOC388755;ACPT;IER2;LOC100131349;LOC651453;LOC100130715;SRGAP1;TSPAN33;LOC652508;BHLHA15;RAB11FIP5;LOC100129342;IL6;LRIG1;LGTN;TGFB3;LOC653421;HS.579351;FGFR3;TUBB4;NUAK2;MED13;IFP38;FAM87B;FRAG1;FLJ31222;SLC25A34;PPIB;TRABD;GSTA3;PCDHB4;FLJ20254;TYRO3;LOC100133080;HS.326560;C2ORF40;UAP1;FGFRL1;SH3YL1;NOMO3;LOC389672;HS.388347;ST7;PPP1R14A;RN5S9;IDH2;LOC137107;CLEC3B;LOC728791;LOC730746;HS.197435;ZFP41;FLJ44054;SNORD1143;FAM174B;LOC100132535;MAPK8IP1;MSH6;ZFPM1;PRDM6;LOC645693;ABCA8;SNORD12;CHN2;TOR2A;HGSNAT;SAA1;C5ORF33;LOC347544;EDG4;WDFY2;RADIL;ACO1;CNTFR;FBXW12;PRO1853;HS.276860;CAT;ANO6;HS.197700;GHR;ATP6V1B1;KRT80;IRX1;LOC100130229;LEP;PSMB10;LOC728572;PPP1R16A;HS.569711;LOC541471;LOC100129882;LOC648394;LOC390876;C9ORF66;NFIB;B3GNT2;FRAT2;LARP1B;SLC12A8;CCL28;FAM92A1;IL20RA;ADCYAP1;ANGPTL4;CDC42EP4;LOC100129121;INHA;SLC7A2;LOC100134420;ECE1;BANF2;KIAA0408;LOC653156;LOC649917;C1ORF198;FLJ12355;LOC729500;LOC401321;C10ORF108;DHRS12;ADH1B;CMTM8;KLF4;DHRS3;LOC100129034;LOC652608;MAP6D1;LOC643960;LOC642377;LOC441763;LOC643002;LOC646672;LOC641849;LOC649948;PLAC9;LOC100130701;LOC647285;LOC346950;AXUD1;C6ORF141;HERPUD1;LOC647673;LOC646966;PDGFD;PLAGL1;PODN;LOC643949;ATPGD1;CERCAM;CYP27B1;VIPR2;MPND;FZD4;SNORA24;PPP1R14B;CENPV;PSMD6;RAB40C;HS.567464;ADCY9;LOC100132199;NFIL3;LOC731139;P2RX4;LOC646533;CTDSP2;LOC729677;KLF6;C7ORF54;LOC652291;HS.153349;LOC255783;PXMP2;LOC402342;IP6K2;CILP;LOC730049;LOC728635;MAMDC2;RPS10P3;LOC100134273;GOLGA9P;ADAMTS9;NOXA1;MAP3K13;C9ORF72;SLC41A1;LOC648099;ZFP36L1;RNU86;ACADS;HDDC3;LOC100129685;C13ORF25;TMEM63A;C11ORF9;LOC100130624;LOC388122;PRSS12;RAB3D;POLR1E;HS.188979;PTP4A1;NOSIP;LOC100133390;SLC33A1;PDE8B;SLC25A25;LOC645968;NARG1L;FAM13A;HS.370359;FMO1;LOC644879;DNAJC3;ARP11;LOC653066;PQLC3;SLIC1;LOC100134364;LOC728014;SLC19A2;COL4A4;CYP4V2;SEC63;KLHL13;RBM35A;CREB3L1;LOC641848;SAV1;C4ORF29;RBM38;SNORA70B;LOC440341;LOC642121;PGM3;LOC390671;LOC100131526;LIFR;SNHG9;RRAS2;APPL1;A2LD1;PECI;LOC100129645;LOC646841;TLE2;LOC728820;KRTCAP2;ELMO3;ST6GALNAC2;LOC649977;LOC653082;LOC441506;MAP2K7;BLNK;LOC100133600;LOC100129599;ZNF395;PCMTD1;ALG3;ALG5;LOC646266;C4ORF14;ORMDL3;CCL8;HS.7093;LOC100130775;LOC439992;STYXL1;SERPINA4;MKNK1;SARDH;EIF2S3;LOC645600;CHDH;TATDN1;EPO;OSR1;ABCC3;RDX;KCTD15;ATP13A2;SHANK2;LOC645430;LOC100129934;DTX3L;METRN;HS.438979;WBSCR27;LOC651198;RRS1;PODXL;RSL1D1;HSPA5;LOC653136;ADD3;FUBP3;LOC643873;LOC647947;TANC1;LOC100188947;OLFM1;LOC440487;LOC100132673;ST6GALNAC6;ZMYND12;LOC100128888;EPHA8;EIF4E3;HS.156773;LOC100132547;PPP1R13B;SCARA5;LOC440348;SUMF2;PEX5L;MTHFD2;LOC100131160;PRRG4;LOC729692;C11ORF2;SNORA66;FLJ22795;LOC645442;TUBG2;GNPNAT1;LOC100130914;HS.46506;LOC389730;HS.452445;HDAC11;THOC4;UBR2;LOC727826;SOLH;HS.550139;CLDND2;FRAS1;E2F1;LOC652342;BCAT2;LOC341315;LOC100128918;LOC400750;ARSA;FAM83F;DAD1L;RNF212;ARHGAP24;LOC644511;LOC644334;FOXA2;LOC646135;BEGAIN;LOC652541;MGC18216;HS6ST2;LOC651659;TDRD1;VAV3;FAM107A;LOC100132037;ADARB2;LOC441032;LOC347292;TMEM51;HS.519225;LOC653344;TMED3;HS.538554;LOC441896;LOC391655;TESC;LOC730284;ECE2;PGA3;HS.563020;SERTAD2;G0S2;FAM176A;MGC26718;C14ORF72;HPCAL4;LOC100128283;MCFD2;STK39;KIAA0513;HS.547503;LOC647251;DHRS4;RSPO3;MYH7;LOC727818;EIF3F;MCEE;SHPK;B3GALNT2;ATF7IP;C8ORF12;ENOSF1;MPV17L;FAM63A;BOP1;LOC646786;PARVA;SCGBL;HS.570636;LASS4;LOC731797;ELOVL7;LOC646527;SELO;IFRD1;SLC31A2;NCLN;SNORA65;HS.566355;GAS2;LOC729021;LOC653737;SPRY2;FBLN2;EIF2A;LOC100134053;MUC6;TMED10;GULP1;LOC644677;LFNG;TMC4;RHBDL3;TMPRSS9;LOC100129952;PHF17;DTWD1;CRELD2;SYVN1;LOC342994;LOC654155;ABHD12;FLJ43663;NT5DC1;LOC100127999;PLA2G4B;CRIPAK;LOC647104;C21ORF30;LOC100133773;LOC100132761;FAM119B;PLA2G12A;LOC642953;ZFAND1;PID1;UBE2F;RGS2;VCAM1;DHRS4L2;MIR21;LOC440503;TDRD3;SLC5A8;LOC729742;IPO4;DUSP19;RNF214;LOC145853;PDIA4;PSEN2;LPCAT3;MAGEL2;EIF5A;TMEM198;LOC390660;LMOD3;C10ORF75;FAM160A2;LOC642580;LOC651635;ARFGAP3;ZNF622;LOC100128060;ZNF503;PARD6A;C1ORF172;LOC100133019;LOC100130276;MIRLET7D;SLITRK4;SEC16A;AHCYL2;LOC645737;CHST3;C8ORF55;LOC100129668;LOC727821;AOC3;CD300LG;HS.442696;ASPA;ACPL2;LOC648705;LOC728002;SNRK;TBC1D5;LOC643888;HSPA7;LOC645944;LOC646779;GGA2;C11ORF52;ZFP57;LOC100134634;HS.269535;UMOD;LOC342979;RNF130;HNMT;USP36;TAF1D;TCEB3;LOC392008;MT1L;YARS;UBE2D4;LOC100133211;HSPB7;MUC15;RPL34;ARHGAP18;PDHA1;DPM3;ITFG3;C6ORF146;PDGFA;KLF10;HS.567033;CNTNAP1;DNAJC4;CYP11B1;LOC100128309;ZNF331;SCGB1D2;LOC440311;BBC3;SLC16A12;LOC100134504;LOC644790;SLITRK5;LOC729406;CADPS2;SNORD48;LOC729780;ACAT1;EIF3A;PWWP2B;TMEM181;CYB561;FZD8;HS.541858;GARNL4;SNORA55;NDST1;HAAO;LOC644889;HECTD3;VKORC1;RETSAT;C10ORF140;LOC642559;UBA5;NOP14;PIP3-E;KLF13;EEF1D;LOC100129673; |

DEGs: Differentially Expressed Gene

**Supplementary Table 5.** Intersection of predicted target genes and differential expression genes.

| down-regulated miRNAs | Up-regulated mRNAs | miRNA LogFC | mRNA LogFC | Up-regulated miRNAs | down-regulated mRNAs | miRNA LogFC | mRNA LogFC |
| --- | --- | --- | --- | --- | --- | --- | --- |
| hsa-miR-455-3p | PAQR8 | -2.0421 | 2.679593 | hsa-miR-125a-5p | KLF13 | 2.439744 | -1.00072 |
| hsa-miR-455-3p | HOXC4 | -2.0421 | 2.212017 | hsa-miR-140-3p | CYB561 | 1.426102 | -1.01219 |
| hsa-miR-455-3p | DLG4 | -2.0421 | 2.022759 | hsa-miR-142-5p | KLF10 | 2.584129 | -1.03587 |
| hsa-miR-455-3p | CAMK2N1 | -2.0421 | 1.944203 | hsa-miR-199b-5p | ITFG3 | 2.571761 | -1.03677 |
| hsa-miR-217 | MAF | -3.56155 | 1.931349 | hsa-miR-199a-5p | ITFG3 | 3.21853 | -1.03677 |
| hsa-miR-217 | CDK5R1 | -3.56155 | 1.817184 | hsa-miR-140-3p | ARHGAP18 | 1.426102 | -1.03901 |
| hsa-miR-455-3p | SUV39H1 | -2.0421 | 1.742262 | hsa-miR-107 | UMOD | 1.26465 | -1.05335 |
| hsa-miR-455-3p | COL4A5 | -2.0421 | 1.700639 | hsa-miR-125a-5p | GGA2 | 2.439744 | -1.05386 |
| hsa-miR-455-3p | TTC9 | -2.0421 | 1.657861 | hsa-miR-107 | SNRK | 1.26465 | -1.05831 |
| hsa-miR-217 | ANLN | -3.56155 | 1.657646 | hsa-miR-324-5p | SLITRK4 | 1.260087 | -1.0678 |
| hsa-miR-217 | RUNX2 | -3.56155 | 1.598813 | hsa-miR-324-5p | RNF214 | 1.260087 | -1.08231 |
| hsa-miR-217 | KLHL29 | -3.56155 | 1.58691 | hsa-miR-125a-5p | NT5DC1 | 2.439744 | -1.09625 |
| hsa-miR-217 | ICK | -3.56155 | 1.548483 | hsa-miR-125a-5p | SYVN1 | 2.439744 | -1.10172 |
| hsa-miR-455-3p | MGLL | -2.0421 | 1.474551 | hsa-miR-140-3p | LFNG | 1.426102 | -1.10759 |
| hsa-miR-455-3p | GABARAPL2 | -2.0421 | 1.457189 | hsa-miR-125a-5p | LFNG | 2.439744 | -1.10759 |
| hsa-miR-455-3p | ANAPC7 | -2.0421 | 1.453395 | hsa-miR-107 | SPRY2 | 1.26465 | -1.11443 |
| hsa-miR-455-3p | NUAK1 | -2.0421 | 1.437528 | hsa-miR-142-3p | ATF7IP | 2.870873 | -1.13045 |
| hsa-miR-455-3p | PRKAR1A | -2.0421 | 1.2757 | hsa-miR-125a-5p | B3GALNT2 | 2.439744 | -1.13046 |
| hsa-miR-455-3p | FBXO45 | -2.0421 | 1.244656 | hsa-miR-324-5p | SHPK | 1.260087 | -1.13068 |
| hsa-miR-217 | KDELC1 | -3.56155 | 1.202672 | hsa-miR-107 | RSPO3 | 1.26465 | -1.13402 |
| hsa-miR-455-3p | EIF4G3 | -2.0421 | 1.121675 | hsa-miR-199b-5p | MCFD2 | 2.571761 | -1.13918 |
| hsa-miR-455-3p | DYNLL1 | -2.0421 | 1.047418 | hsa-miR-199a-5p | MCFD2 | 3.21853 | -1.13918 |
| hsa-miR-455-3p | H2AFZ | -2.0421 | 1.012244 | hsa-miR-107 | MCFD2 | 1.26465 | -1.13918 |
|  |  |  |  | hsa-miR-107 | VAV3 | 1.26465 | -1.1591 |
|  |  |  |  | hsa-miR-107 | BCAT2 | 1.26465 | -1.1726 |
|  |  |  |  | hsa-miR-107 | GNPNAT1 | 1.26465 | -1.1822 |
|  |  |  |  | hsa-miR-125a-5p | ST6GALNAC6 | 2.439744 | -1.19943 |
|  |  |  |  | hsa-miR-142-3p | FUBP3 | 2.870873 | -1.20578 |
|  |  |  |  | hsa-miR-199b-5p | ADD3 | 2.571761 | -1.20724 |
|  |  |  |  | hsa-miR-199a-5p | ADD3 | 3.21853 | -1.20724 |
|  |  |  |  | hsa-miR-140-3p | ADD3 | 1.426102 | -1.20724 |
|  |  |  |  | hsa-miR-199b-5p | HSPA5 | 2.571761 | -1.21129 |
|  |  |  |  | hsa-miR-199a-5p | HSPA5 | 3.21853 | -1.21129 |
|  |  |  |  | hsa-miR-199b-5p | PODXL | 2.571761 | -1.2116 |
|  |  |  |  | hsa-miR-199a-5p | PODXL | 3.21853 | -1.2116 |
|  |  |  |  | hsa-miR-125a-5p | PODXL | 2.439744 | -1.2116 |
|  |  |  |  | hsa-miR-490-3p | SHANK2 | 1.804387 | -1.22428 |
|  |  |  |  | hsa-miR-199b-5p | ATP13A2 | 2.571761 | -1.22547 |
|  |  |  |  | hsa-miR-199a-5p | ATP13A2 | 3.21853 | -1.22547 |
|  |  |  |  | hsa-miR-142-3p | RDX | 2.870873 | -1.22811 |
|  |  |  |  | hsa-miR-199b-5p | OSR1 | 2.571761 | -1.22947 |
|  |  |  |  | hsa-miR-199a-5p | OSR1 | 3.21853 | -1.22947 |
|  |  |  |  | hsa-miR-142-3p | ZNF395 | 2.870873 | -1.24338 |
|  |  |  |  | hsa-miR-125a-5p | MAP2K7 | 2.439744 | -1.24888 |
|  |  |  |  | hsa-miR-142-3p | RRAS2 | 2.870873 | -1.25746 |
|  |  |  |  | hsa-miR-107 | PDE8B | 1.26465 | -1.29251 |
|  |  |  |  | hsa-miR-142-3p | RAB3D | 2.870873 | -1.29876 |
|  |  |  |  | hsa-miR-125a-5p | RAB3D | 2.439744 | -1.29876 |
|  |  |  |  | hsa-miR-125a-5p | HDDC3 | 2.439744 | -1.30964 |
|  |  |  |  | hsa-miR-125a-5p | MAMDC2 | 2.439744 | -1.31613 |
|  |  |  |  | hsa-miR-199b-5p | NFIL3 | 2.571761 | -1.33438 |
|  |  |  |  | hsa-miR-199a-5p | NFIL3 | 3.21853 | -1.33438 |
|  |  |  |  | hsa-miR-142-3p | RAB40C | 2.870873 | -1.33979 |
|  |  |  |  | hsa-miR-199b-5p | FZD4 | 2.571761 | -1.34624 |
|  |  |  |  | hsa-miR-199a-5p | FZD4 | 3.21853 | -1.34624 |
|  |  |  |  | hsa-miR-490-3p | PLAGL1 | 1.804387 | -1.35185 |
|  |  |  |  | hsa-miR-142-5p | HERPUD1 | 2.584129 | -1.35662 |
|  |  |  |  | hsa-miR-142-3p | HERPUD1 | 2.870873 | -1.35662 |
|  |  |  |  | hsa-miR-140-3p | KLF4 | 1.426102 | -1.37476 |
|  |  |  |  | hsa-miR-199b-5p | ECE1 | 2.571761 | -1.39518 |
|  |  |  |  | hsa-miR-199a-5p | ECE1 | 3.21853 | -1.39518 |
|  |  |  |  | hsa-miR-140-3p | ECE1 | 1.426102 | -1.39518 |
|  |  |  |  | hsa-miR-125a-5p | ECE1 | 2.439744 | -1.39518 |
|  |  |  |  | hsa-miR-142-5p | FAM92A1 | 2.584129 | -1.40391 |
|  |  |  |  | hsa-miR-107 | NFIB | 1.26465 | -1.41406 |
|  |  |  |  | hsa-miR-142-3p | GHR | 2.870873 | -1.43012 |
|  |  |  |  | hsa-miR-125a-5p | ANO6 | 2.439744 | -1.43219 |
|  |  |  |  | hsa-miR-193a-5p | CNTFR | 1.065578 | -1.43616 |
|  |  |  |  | hsa-miR-125a-5p | TOR2A | 2.439744 | -1.44119 |
|  |  |  |  | hsa-miR-199b-5p | CHN2 | 2.571761 | -1.44167 |
|  |  |  |  | hsa-miR-199a-5p | CHN2 | 3.21853 | -1.44167 |
|  |  |  |  | hsa-miR-142-5p | MSH6 | 2.584129 | -1.45178 |
|  |  |  |  | hsa-miR-140-3p | FAM174B | 1.426102 | -1.45424 |
|  |  |  |  | hsa-miR-140-3p | LRIG1 | 1.426102 | -1.49814 |
|  |  |  |  | hsa-miR-125a-5p | IER2 | 2.439744 | -1.51477 |
|  |  |  |  | hsa-miR-199b-5p | ACPT | 2.571761 | -1.51673 |
|  |  |  |  | hsa-miR-199a-5p | ACPT | 3.21853 | -1.51673 |
|  |  |  |  | hsa-miR-142-3p | PPAP2B | 2.870873 | -1.52301 |
|  |  |  |  | hsa-miR-140-3p | PPAP2B | 1.426102 | -1.52301 |
|  |  |  |  | hsa-miR-140-3p | LPAR2 | 1.426102 | -1.53884 |
|  |  |  |  | hsa-miR-199b-5p | ZBTB42 | 2.571761 | -1.54585 |
|  |  |  |  | hsa-miR-199a-5p | ZBTB42 | 3.21853 | -1.54585 |
|  |  |  |  | hsa-miR-142-3p | AVPI1 | 2.870873 | -1.55923 |
|  |  |  |  | hsa-miR-107 | ASH1L | 1.26465 | -1.5633 |
|  |  |  |  | hsa-miR-324-5p | RCAN1 | 1.260087 | -1.581 |
|  |  |  |  | hsa-miR-107 | RCAN1 | 1.26465 | -1.581 |
|  |  |  |  | hsa-miR-199b-5p | PLXNA2 | 2.571761 | -1.66308 |
|  |  |  |  | hsa-miR-199a-5p | PLXNA2 | 3.21853 | -1.66308 |
|  |  |  |  | hsa-miR-324-5p | PBX1 | 1.260087 | -1.66764 |
|  |  |  |  | hsa-miR-142-3p | TPM1 | 2.870873 | -1.66827 |
|  |  |  |  | hsa-miR-193a-5p | ANGEL1 | 1.065578 | -1.6828 |
|  |  |  |  | hsa-miR-140-3p | ANGEL1 | 1.426102 | -1.6828 |
|  |  |  |  | hsa-miR-125a-5p | SLC7A1 | 2.439744 | -1.70358 |
|  |  |  |  | hsa-miR-140-3p | SSR3 | 1.426102 | -1.7122 |
|  |  |  |  | hsa-miR-125a-5p | NPL | 2.439744 | -1.75449 |
|  |  |  |  | hsa-miR-107 | SRM | 1.26465 | -1.79843 |
|  |  |  |  | hsa-miR-142-3p | SERP1 | 2.870873 | -1.80796 |
|  |  |  |  | hsa-miR-140-3p | PLEKHG3 | 1.426102 | -1.8703 |
|  |  |  |  | hsa-miR-107 | PHYHIPL | 1.26465 | -1.88884 |
|  |  |  |  | hsa-miR-193a-5p | GOLGA8B | 1.065578 | -1.92421 |
|  |  |  |  | hsa-miR-125a-5p | GPC4 | 2.439744 | -1.94726 |
|  |  |  |  | hsa-miR-190b | PLD1 | 1.300676 | -1.97595 |
|  |  |  |  | hsa-miR-342-3p | ID4 | 2.110853 | -2.0272 |
|  |  |  |  | hsa-miR-193a-5p | GOLGA8A | 1.065578 | -2.09179 |
|  |  |  |  | hsa-miR-142-3p | GFI1 | 2.870873 | -2.09631 |
|  |  |  |  | hsa-miR-140-3p | SIX5 | 1.426102 | -2.0995 |
|  |  |  |  | hsa-miR-125a-5p | SH3BP4 | 2.439744 | -2.10457 |
|  |  |  |  | hsa-miR-107 | SH3BP4 | 1.26465 | -2.10457 |
|  |  |  |  | hsa-miR-107 | SVEP1 | 1.26465 | -2.11563 |
|  |  |  |  | hsa-miR-125a-5p | ARID3B | 2.439744 | -2.20129 |
|  |  |  |  | hsa-miR-125a-5p | SLC25A15 | 2.439744 | -2.21517 |
|  |  |  |  | hsa-miR-140-3p | SDC4 | 1.426102 | -2.24448 |
|  |  |  |  | hsa-miR-342-3p | PIWIL2 | 2.110853 | -2.27063 |
|  |  |  |  | hsa-miR-125a-5p | RAPGEF5 | 2.439744 | -2.27803 |
|  |  |  |  | hsa-miR-107 | COBLL1 | 1.26465 | -2.3096 |
|  |  |  |  | hsa-miR-125a-5p | BCL2L12 | 2.439744 | -2.46893 |
|  |  |  |  | hsa-miR-190b | CEBPA | 1.300676 | -2.47932 |
|  |  |  |  | hsa-miR-331-3p | MEIS1 | 1.793161 | -2.51535 |
|  |  |  |  | hsa-miR-107 | PDK4 | 1.26465 | -2.5941 |
|  |  |  |  | hsa-miR-142-3p | IER3 | 2.870873 | -2.67754 |
|  |  |  |  | hsa-miR-199b-5p | CSDC2 | 2.571761 | -2.77453 |
|  |  |  |  | hsa-miR-199a-5p | CSDC2 | 3.21853 | -2.77453 |
|  |  |  |  | hsa-miR-190b | CAT | 1.300676 | -2.89918 |
|  |  |  |  | hsa-miR-107 | DLL1 | 1.26465 | -3.00906 |
|  |  |  |  | hsa-miR-142-3p | SIK1 | 2.870873 | -3.01828 |
|  |  |  |  | hsa-miR-142-3p | SGK1 | 2.870873 | -3.03858 |
|  |  |  |  | hsa-miR-142-3p | PROM1 | 2.870873 | -3.06598 |
|  |  |  |  | hsa-miR-140-3p | PELI2 | 1.426102 | -3.22987 |
|  |  |  |  | hsa-miR-142-3p | LMO3 | 2.870873 | -3.28309 |
|  |  |  |  | hsa-miR-125a-5p | ENPP1 | 2.439744 | -3.31135 |
|  |  |  |  | hsa-miR-125a-5p | VTCN1 | 2.439744 | -3.35965 |
|  |  |  |  | hsa-miR-142-3p | ACADL | 2.870873 | -3.60841 |
|  |  |  |  | hsa-miR-107 | BTG2 | 1.26465 | -3.85109 |
|  |  |  |  | hsa-miR-342-3p | CA12 | 2.110853 | -3.85925 |
|  |  |  |  | hsa-miR-125a-5p | SEL1L | 2.439744 | -4.09967 |
|  |  |  |  | hsa-miR-125a-5p | BCAT1 | 2.439744 | -4.28724 |
|  |  |  |  | hsa-miR-125a-5p | ANPEP | 2.439744 | -5.49418 |

**Supplementary Table 6.** Expression level of DEMIs and target DEGs in normal human pancreatic duct epithelial cells and PAAD cell lines (‾X±s, n=3)

| group | HPNE | ASPC-1 | BXPC-3 | MIAPACA-2 | PANC1 |
| --- | --- | --- | --- | --- | --- |
| miRNA-455-3p | 1.00±0.12 | 0.08±0.01 | 0.68±0.21 | 0.44±0.06 | 0.41±0.04****** |
| DLG4 | 1.00±0.05 | 1.76±0.25 | 1.33±0.02***** | 1.86±0.17***** | 1.41±0.18 |
| DYNLL1 | 1.02±0.22 | 8.97±2.20****** | 11.30±1.76****** | 4.66±0.87****** | 4.08±0.25***** |
| FBXO45 | 1.01±0.18 | 1.41±0.15 | 2.01±0.28 | 2.53±0.89 | 2.84±0.32***** |
| HOXC4 | 1.03±0.31 | 3.51±0.13****** | 2.49±0.18****** | 1.09±0.08 | 1.50±0.11***** |
| MGLL | 1.01±0.18 | 1.13±0.13 | 1.12±0.04 | 1.08±0.09 | 1.15±0.06 |

Expression level ofmiR-455-3p, MGLL, FBXO45, DLG4, HOXC4 and DYNLL1 in HPNE, PANC1, ASPC-1, BXPC-3, and MIAPACA-2. Data are expressed as the mean ± S.E.M. of three independent experiments. ******P*<0.05, *******P* <0.01.
